# Supplementary material
Source: PubMed Central journal article supplement (PMC4864264)

**Supplementary Figure 1: Differential methylation in methylation clusters 1 - 3.** Volcano plot

showing differential methylation of genes between methylation cluster 1 and methylation cluster 2, methylation cluster 1 and methylation cluster 3 and methylation cluster 2 and methylation cluster 3.

The plot displays the difference of the median methylation of a gene plotted against the  $-\log_{10}$  unadjusted t-test p-values. Significantly differentially methylated genes ( $FDR < 0.05$ ) are shown in red.

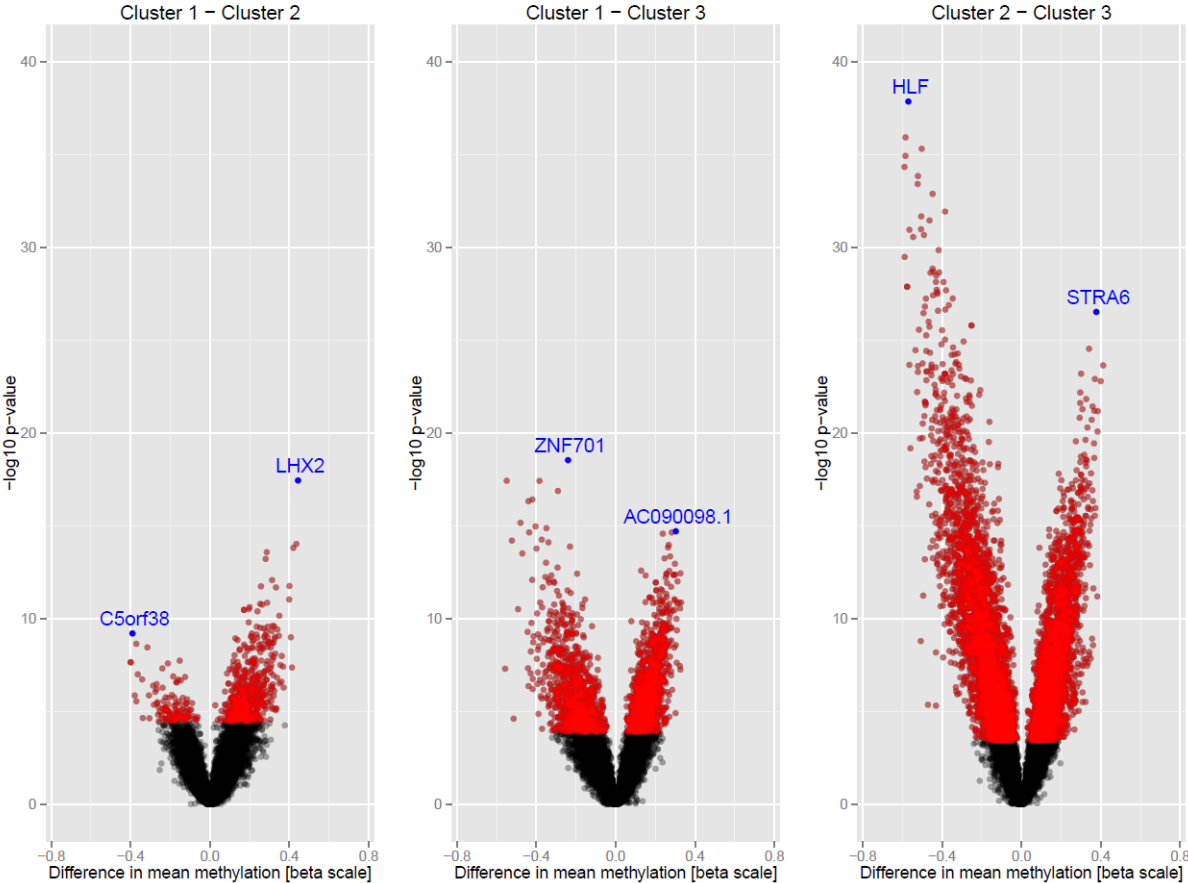

Supplement: supp_nov322_nov322supp_fig1.pdf [file supp_nov322_nov322supp_fig1.pdf]
