# Supplementary material
Source: PubMed Central journal article supplement (PMC4864264)
Supplement: supp_nov322_nov322supp_table1.pdf [file supp_nov322_nov322supp_table1.pdf]

**Supplementary Table 1: Detailed patient characteristics.**

| Case No. | Sex    | Age (Years) | Diagnosis | Tumor Location    | Chemotherapy | Radiotherapy | p53 Over-expression (%) |
|----------|--------|-------------|-----------|-------------------|--------------|--------------|-------------------------|
| 1        | Female | 1           | CPP       | Fourth ventricle  | No           | No           | 0                       |
| 2        | Male   | 2           | CPP       | Fourth ventricle  | No           | No           | 0                       |
| 3        | Male   | 4           | CPP       | Lateral ventricle | No           | No           | -*                      |
| 4        | Male   | 8           | CPP       | Lateral ventricle | No           | No           | -*                      |
| 5        | Female | 1           | CPP       | Fourth ventricle  | No           | No           | 0                       |
| 6        | Male   | 1           | CPP       | Third ventricle   | No           | No           | 0                       |
| 7        | Male   | 3           | CPP       | Third ventricle   | No           | No           | 0                       |
| 8        | Female | 18          | CPP       | Lateral ventricle | -*           | -*           | 0                       |
| 9        | Male   | 59          | CPP       | Fourth ventricle  | No           | No           | 0                       |
| 10       | Female | 35          | CPP       | Fourth ventricle  | No           | No           | 0                       |
| 11       | Male   | 34          | CPP       | Fourth ventricle  | No           | No           | 0                       |
| 12       | Female | 32          | CPP       | Fourth ventricle  | No           | No           | 0                       |
| 13       | Male   | 55          | CPP       | Fourth ventricle  | No           | No           | 0                       |
| 14       | Female | 39          | CPP       | Fourth ventricle  | No           | No           | -*                      |
| 15       | Male   | 16          | CPP       | Fourth ventricle  | Yes          | No           | -*                      |
| 16       | Male   | 26          | CPP       | Fourth ventricle  | -*           | -*           | 0                       |
| 17       | Male   | 44          | CPP       | Fourth ventricle  | No           | No           | -*                      |
| 18       | Female | 71          | CPP       | Fourth ventricle  | -*           | -*           | 0                       |
| 19       | Female | 59          | CPP       | Fourth ventricle  | -*           | -*           | -*                      |
| 20       | Female | 35          | CPP       | Fourth ventricle  | -*           | -*           | -*                      |
| 21       | Female | 53          | CPP       | Fourth ventricle  | -*           | -*           | 0                       |
| 22       | Female | 23          | CPP       | Fourth ventricle  | No           | No           | -*                      |
| 23       | Male   | 37          | CPP       | Fourth ventricle  | -*           | -*           | 0                       |
| 24       | Female | 12          | CPP       | Fourth ventricle  | No           | No           | 0                       |
| 25       | Female | 12          | CPP       | Fourth ventricle  | No           | No           | -*                      |
| 26       | Female | 1           | CPP       | Lateral ventricle | -*           | -*           | 0                       |
| 27       | Male   | 10          | CPP       | Lateral ventricle | Yes          | Yes          | 0                       |
| 28       | Male   | 1           | CPP       | Lateral ventricle | Yes          | No           | 0                       |
| 29       | Male   | 15          | CPP       | Lateral ventricle | No           | No           | 0                       |
| 30       | Male   | 12          | aCPP      | Lateral ventricle | -*           | -*           | 0                       |
| 31       | Female | 0           | aCPP      | Lateral ventricle | -*           | -*           | -*                      |
| 32       | Male   | 0           | aCPP      | Fourth ventricle  | -*           | -*           | -*                      |
| 33       | Female | 9           | aCPP      | Fourth ventricle  | -*           | -*           | 3                       |
| 34       | Female | 0           | aCPP      | Third ventricle   | No           | No           | -*                      |
| 35       | Male   | 0           | aCPP      | Lateral ventricle | No           | No           | 1                       |
| 36       | Male   | 1           | aCPP      | Lateral ventricle | Yes          | No           | 0                       |
| 37       | Female | 0           | aCPP      | Lateral ventricle | Yes          | No           | 0                       |
| 38       | Male   | 1           | aCPP      | Lateral ventricle | No           | No           | 0                       |
| 39       | Male   | 0           | aCPP      | Lateral ventricle | Yes          | No           | 0                       |
| 40       | Male   | 46          | aCPP      | -*                | No           | Yes          | -*                      |
| 41       | Male   | 20          | aCPP      | Fourth ventricle  | -*           | -*           | 8                       |
| 42       | Female | -*          | aCPP      | Third ventricle   | -*           | -*           | -*                      |
| 43       | Female | 48          | aCPP      | Lateral ventricle | -*           | -*           | 1                       |
| 44       | Male   | 51          | aCPP      | Fourth ventricle  | -*           | -*           | 2                       |
| 45       | Male   | 70          | aCPP      | Fourth ventricle  | -*           | -*           | 1                       |
| 46       | Female | 23          | aCPP      | Fourth ventricle  | -*           | -*           | 0                       |
| 47       | Female | 38          | aCPP      | Fourth ventricle  | -*           | -*           | 2                       |
| 48       | Female | 1           | aCPP      | Lateral ventricle | No           | No           | 0                       |

|    |        |    |      |                   |     |     |    |
|----|--------|----|------|-------------------|-----|-----|----|
| 49 | Male   | 2  | aCPP | Lateral ventricle | No  | No  | 0  |
| 50 | Male   | 7  | aCPP | Lateral ventricle | Yes | Yes | 0  |
| 51 | Male   | 1  | aCPP | Lateral ventricle | -*  | -*  | 8  |
| 52 | Male   | 5  | aCPP | Lateral ventricle | -*  | -*  | -* |
| 53 | Male   | 14 | aCPP | -*                | Yes | Yes | 20 |
| 54 | Male   | 1  | aCPP | Lateral ventricle | -*  | -*  | -* |
| 55 | Female | 1  | aCPP | Lateral ventricle | -*  | -*  | 1  |
| 56 | Male   | 6  | aCPP | Lateral ventricle | -*  | -*  | 0  |
| 57 | Female | 0  | aCPP | Lateral ventricle | -*  | -*  | 0  |
| 58 | Male   | 7  | aCPP | Lateral ventricle | No  | No  | 0  |
| 59 | Female | 0  | aCPP | Lateral ventricle | No  | No  | 0  |
| 60 | Female | 0  | aCPP | Lateral ventricle | No  | No  | 0  |
| 61 | Male   | 0  | aCPP | -*                | Yes | No  | 0  |
| 62 | Male   | 1  | CPC  | -*                | No  | No  | 20 |
| 63 | Female | 2  | CPC  | Lateral ventricle | Yes | -*  | 5  |
| 64 | Female | 1  | CPC  | Lateral ventricle | No  | No  | 0  |
| 65 | Female | 1  | CPC  | Lateral ventricle | Yes | No  | 0  |
| 66 | Male   | 5  | CPC  | Lateral ventricle | -*  | -*  | 15 |
| 67 | Male   | 0  | CPC  | Lateral ventricle | -*  | -*  | 0  |
| 68 | Female | 0  | CPC  | -*                | -*  | -*  | 3  |
| 69 | Male   | 20 | CPC  | -*                | -*  | -*  | 10 |
| 70 | Male   | 2  | CPC  | Lateral ventricle | -*  | -*  | 0  |
| 71 | Female | 2  | CPC  | Lateral ventricle | -*  | -*  | -* |
| 72 | Male   | 31 | CPC  | Lateral ventricle | Yes | No  | 0  |
| 73 | Male   | 4  | CPC  | Lateral ventricle | -*  | -*  | 70 |
| 74 | Male   | 2  | CPC  | Lateral ventricle | -*  | -*  | 80 |
| 75 | Female | 0  | CPC  | Lateral ventricle | Yes | Yes | 0  |
| 76 | Male   | 13 | CPC  | Lateral ventricle | No  | No  | 0  |
| 77 | Male   | 3  | CPC  | Lateral ventricle | Yes | Yes | 0  |
| 78 | Female | 2  | CPC  | Lateral ventricle | Yes | No  | 0  |
| 79 | Female | 4  | CPC  | Lateral ventricle | Yes | Yes | 0  |
| 80 | Male   | 7  | CPC  | Lateral ventricle | Yes | Yes | 0  |
| 81 | Female | 6  | CPC  | Lateral ventricle | Yes | Yes | 0  |
| 82 | Female | 1  | CPC  | Lateral ventricle | -*  | -*  | 0  |
| 83 | Male   | 2  | CPC  | Lateral ventricle | Yes | No  | 1  |
| 84 | Male   | 1  | CPC  | Lateral ventricle | Yes | Yes | 2  |
| 85 | Male   | 12 | CPC  | Lateral ventricle | Yes | Yes | 2  |
| 86 | Male   | 16 | CPC  | Lateral ventricle | Yes | Yes | 5  |
| 87 | Male   | 1  | CPC  | Lateral ventricle | Yes | No  | 7  |
| 88 | Female | 1  | CPC  | Lateral ventricle | No  | No  | 15 |
| 89 | Female | 2  | CPC  | Lateral ventricle | Yes | No  | 15 |
| 90 | Male   | 1  | CPC  | Lateral ventricle | Yes | No  | 30 |
| 91 | Male   | 5  | CPC  | Lateral ventricle | Yes | Yes | 70 |
| 92 | Male   | 2  | CPC  | Lateral ventricle | Yes | No  | 80 |

\*no data available
