# Supplementary material
Source: PubMed Central journal article supplement (PMC4864264)
Supplement: supp_nov322_nov322supp_table2.pdf [file supp_nov322_nov322supp_table2.pdf]

**Supplementary Table 2: Methylation profiling:** Differentially methylated genes between the three methylation clusters (methylation cluster 1, n=18; methylation cluster 2, n=24; methylation cluster 3, n=50; the 100 genes with the smallest p-values are listed). Correction for multiple testing was performed using the Benjamini-Hochberg method. Genes were considered significantly differentially methylated between groups when displaying an FDR adjusted p-value <0.05.

**Methylation cluster 1 versus methylation cluster 2.**

| <b>SYMBOL</b> | <b>median diff.</b> | <b>T-statistic</b> | <b>p-value</b> | <b>adjusted p-value</b> |
|---------------|---------------------|--------------------|----------------|-------------------------|
| LHX2          | 0,459237027         | 16,76088           | 3,64E-18       | 6,59E-14                |
| SESN3         | 0,42306644          | 11,93066           | 9,52E-15       | 8,62E-11                |
| RAX           | 0,457901089         | 11,76235           | 1,55E-14       | 9,33E-11                |
| PMAIP1        | 0,304390456         | 11,69908           | 2,63E-14       | 1,19E-10                |
| RBM20         | 0,308408869         | 11,70531           | 6,12E-14       | 2,22E-10                |
| LDLRAD3       | 0,360139889         | 10,70699           | 8,42E-13       | 2,54E-09                |
| KCNQ5         | 0,471142034         | 11,47806           | 1,75E-12       | 4,15E-09                |
| PAK6          | 0,28235764          | 11,74461           | 1,83E-12       | 4,15E-09                |
| MAP3K14       | 0,358352749         | 10,02777           | 2,09E-12       | 4,21E-09                |
| MEGF11        | 0,423910534         | 9,615476           | 9,3E-12        | 1,68E-08                |
| LASP1         | 0,293811652         | 10,31275           | 1,4E-11        | 2,31E-08                |
| C20orf103     | 0,265009673         | 9,465886           | 1,62E-11       | 2,45E-08                |
| MMS19         | 0,299686066         | 9,244322           | 1,77E-11       | 2,47E-08                |
| C6orf81       | 0,222432087         | 9,181392           | 2,41E-11       | 3,12E-08                |
| RP11-404L6.2  | 0,195446453         | 9,067171           | 3,08E-11       | 3,63E-08                |
| C9orf47       | 0,160946731         | 11,19667           | 3,41E-11       | 3,63E-08                |
| S1PR3         | 0,160946731         | 11,19667           | 3,41E-11       | 3,63E-08                |
| S1PR5         | 0,242868563         | 9,242821           | 4,07E-11       | 4,09E-08                |
| SIX2          | 0,3706194           | 10,8165            | 7,04E-11       | 6,71E-08                |
| RASL10B       | 0,176114712         | 8,590157           | 1,59E-10       | 1,44E-07                |
| KL            | 0,368458925         | 8,668613           | 2,46E-10       | 2,05E-07                |
| KDR           | 0,369903823         | 8,932909           | 2,61E-10       | 2,05E-07                |
| C18orf1       | 0,301973733         | 9,817091           | 2,71E-10       | 2,05E-07                |
| ASGR2         | 0,197100928         | 8,424958           | 2,71E-10       | 2,05E-07                |
| AQP4          | 0,26391902          | 8,374578           | 3,16E-10       | 2,29E-07                |
| NCRNA00346    | 0,326485071         | 8,606412           | 3,34E-10       | 2,33E-07                |
| FAM19A2       | 0,390398171         | 8,245951           | 3,87E-10       | 2,59E-07                |
| HPD           | 0,373600571         | 8,267813           | 4,74E-10       | 3,07E-07                |
| CHST15        | 0,288151059         | 10,30749           | 4,97E-10       | 3,1E-07                 |
| ALDH5A1       | 0,227361147         | 8,101723           | 6,34E-10       | 3,79E-07                |
| C5orf38       | -0,472660393        | -8,91831           | 6,48E-10       | 3,79E-07                |
| MSTN          | 0,273602577         | 8,308044           | 7,25E-10       | 4,1E-07                 |
| PDS5B         | 0,317872721         | 8,176142           | 7,81E-10       | 4,29E-07                |
| TAL2          | 0,394469533         | 8,145972           | 8,47E-10       | 4,51E-07                |
| FAM53B        | 0,224447018         | 8,680474           | 8,9E-10        | 4,57E-07                |
| GABBR1        | 0,232711957         | 8,020983           | 9,54E-10       | 4,57E-07                |
| CD8A          | 0,379713949         | 8,096114           | 9,67E-10       | 4,57E-07                |
| MSC           | 0,294569308         | 8,155565           | 9,83E-10       | 4,57E-07                |

---

|            |              |          |          |          |
|------------|--------------|----------|----------|----------|
| DUSP5      | 0,344858004  | 8,168202 | 9,9E-10  | 4,57E-07 |
| DMRT3      | 0,455031144  | 10,46736 | 1,01E-09 | 4,57E-07 |
| C1orf111   | 0,295952304  | 8,281449 | 1,08E-09 | 4,79E-07 |
| SPRED1     | 0,130586014  | 8,054068 | 1,16E-09 | 5E-07    |
| TMPRSS2    | 0,379093871  | 8,56841  | 1,24E-09 | 5,23E-07 |
| DLEU1      | 0,15176607   | 7,808742 | 1,44E-09 | 5,9E-07  |
| EHF        | 0,213362071  | 7,90141  | 1,47E-09 | 5,9E-07  |
| PREX1      | 0,32050596   | 7,804692 | 1,55E-09 | 6,12E-07 |
| GPLD1      | 0,200754043  | 8,51808  | 1,71E-09 | 6,6E-07  |
| PPP1R1B    | 0,293802285  | 8,789722 | 1,86E-09 | 7E-07    |
| C1orf132   | 0,329639254  | 7,873635 | 1,9E-09  | 7,03E-07 |
| SPN        | 0,38834597   | 7,703826 | 2,05E-09 | 7,27E-07 |
| QPRT       | 0,38834597   | 7,703826 | 2,05E-09 | 7,27E-07 |
| CHRNB1     | 0,367301183  | 7,755825 | 2,2E-09  | 7,67E-07 |
| IRX2       | -0,454740245 | -8,58194 | 2,29E-09 | 7,82E-07 |
| SLC1A4     | 0,226482736  | 7,682145 | 2,38E-09 | 7,99E-07 |
| PIGS       | 0,278125521  | 7,636285 | 2,48E-09 | 8,15E-07 |
| FAM110A    | 0,16498818   | 7,985576 | 2,53E-09 | 8,17E-07 |
| MASP1      | 0,329107153  | 8,177626 | 3,3E-09  | 1,04E-06 |
| C1orf130   | 0,190259813  | 7,827935 | 3,33E-09 | 1,04E-06 |
| SH2D2A     | 0,238709     | 8,003443 | 3,53E-09 | 1,08E-06 |
| C8orf31    | -0,308882438 | -7,63085 | 3,58E-09 | 1,08E-06 |
| KCNK15     | 0,36776578   | 8,082395 | 3,67E-09 | 1,08E-06 |
| METTL11A   | 0,276819207  | 8,315137 | 3,68E-09 | 1,08E-06 |
| MEGF10     | 0,31792315   | 8,979228 | 3,84E-09 | 1,1E-06  |
| CREB5      | 0,210275285  | 8,059765 | 3,88E-09 | 1,1E-06  |
| CTGF       | 0,181508333  | 7,548805 | 4E-09    | 1,11E-06 |
| ST14       | 0,274816515  | 8,270421 | 4,12E-09 | 1,13E-06 |
| B4GALT6    | 0,269794961  | 8,561605 | 4,22E-09 | 1,14E-06 |
| DGKG       | 0,148490939  | 7,526293 | 4,52E-09 | 1,2E-06  |
| ABCD3      | 0,155917316  | 8,114357 | 5,08E-09 | 1,33E-06 |
| TMEM229B   | 0,212965996  | 7,584261 | 5,51E-09 | 1,42E-06 |
| SULF2      | 0,284973246  | 8,601782 | 6,42E-09 | 1,64E-06 |
| TXLNB      | 0,355599915  | 7,639829 | 7,83E-09 | 1,97E-06 |
| AL135998.1 | 0,307715816  | 7,598293 | 8,93E-09 | 2,22E-06 |
| KRTAP10-1  | 0,115619235  | 7,420912 | 9,42E-09 | 2,3E-06  |
| CTSD       | 0,176988649  | 7,442351 | 1,02E-08 | 2,47E-06 |
| FEZF2      | 0,407581755  | 8,349644 | 1,04E-08 | 2,49E-06 |
| TMEM154    | 0,305005549  | 7,96205  | 1,18E-08 | 2,78E-06 |
| SLC39A14   | 0,211786402  | 7,095191 | 1,39E-08 | 3,22E-06 |
| OLFML2A    | 0,226556179  | 7,283486 | 1,5E-08  | 3,44E-06 |
| DLX5       | 0,391976525  | 7,232285 | 1,69E-08 | 3,82E-06 |
| GATA3      | 0,283967358  | 7,162342 | 1,77E-08 | 3,97E-06 |
| C20orf46   | 0,213448291  | 7,018099 | 1,84E-08 | 3,98E-06 |
| SLC9A10    | 0,274562841  | 7,254994 | 1,84E-08 | 3,98E-06 |
| OR11A1     | -0,153326412 | -7,06202 | 1,84E-08 | 3,98E-06 |
| IL24       | 0,104494865  | 7,234772 | 1,92E-08 | 4,09E-06 |
| NR4A3      | 0,361564065  | 6,986313 | 1,96E-08 | 4,13E-06 |
| MERTK      | 0,196571583  | 7,237583 | 2,04E-08 | 4,25E-06 |
| FAM165B    | 0,137361414  | 7,001882 | 2,17E-08 | 4,46E-06 |
| SNX31      | 0,198502821  | 7,039382 | 2,22E-08 | 4,48E-06 |

---

|         |              |          |          |          |
|---------|--------------|----------|----------|----------|
| RRP1B   | -0,477011735 | -9,1154  | 2,26E-08 | 4,48E-06 |
| HSF2BP  | -0,477011735 | -9,1154  | 2,26E-08 | 4,48E-06 |
| PPP1R3C | 0,223794957  | 6,984303 | 2,27E-08 | 4,48E-06 |
| FAM131A | 0,262724862  | 7,307224 | 2,31E-08 | 4,5E-06  |
| LAMA2   | 0,245204549  | 7,394504 | 2,6E-08  | 4,94E-06 |
| GALNT9  | -0,245386329 | -7,182   | 2,6E-08  | 4,94E-06 |
| CXCL2   | 0,23821851   | 6,896296 | 2,62E-08 | 4,94E-06 |
| GNG4    | 0,316735468  | 6,913833 | 2,86E-08 | 5,34E-06 |
| SEPT4   | 0,203838557  | 6,965689 | 2,98E-08 | 5,51E-06 |
| KLB     | 0,440463767  | 7,721573 | 3,17E-08 | 5,81E-06 |
| DIXDC1  | 0,131423823  | 6,874488 | 3,22E-08 | 5,83E-06 |

### Methylation cluster 1 versus methylation cluster 3.

| SYMBOL      | median diff. | T-statistic | p-value  | adjusted p-value |
|-------------|--------------|-------------|----------|------------------|
| ZNF701      | -0,27764     | -13,4254    | 2,87E-19 | 5,2E-15          |
| ANKK1       | -0,6136      | -15,618     | 3,75E-18 | 2,3E-14          |
| SLC8A3      | -0,45439     | -12,212     | 3,81E-18 | 2,3E-14          |
| POU4F3      | -0,28014     | -11,6725    | 1,33E-17 | 6,02E-14         |
| GPR25       | -0,46879     | -13,1529    | 3,84E-17 | 1,39E-13         |
| NR5A2       | -0,5087      | -11,6011    | 4,71E-17 | 1,42E-13         |
| ANK1        | -0,57376     | -12,1573    | 6,95E-16 | 1,8E-12          |
| PCDHGC5     | -0,52661     | -10,8001    | 1,08E-15 | 2,44E-12         |
| SHMT2       | -0,38973     | -10,7646    | 1,34E-15 | 2,7E-12          |
| AC090098.1  | 0,348705     | 10,34536    | 1,92E-15 | 3,45E-12         |
| ITGAL       | -0,49348     | -11,8899    | 2,26E-15 | 3,45E-12         |
| CD1A        | 0,313928     | 10,43853    | 2,29E-15 | 3,45E-12         |
| NMT1        | 0,262126     | 10,2596     | 2,68E-15 | 3,73E-12         |
| HOXD13      | -0,43624     | -12,3916    | 5,59E-15 | 7,23E-12         |
| CALCB       | -0,58874     | -12,7354    | 6,27E-15 | 7,57E-12         |
| CYP1A1      | -0,3588      | -12,5801    | 7,84E-15 | 8,87E-12         |
| OR8K1       | 0,298445     | 10,01836    | 1,07E-14 | 1,14E-11         |
| EN1         | -0,23136     | -9,8632     | 1,32E-14 | 1,33E-11         |
| OR6K6       | 0,271313     | 9,835207    | 1,47E-14 | 1,4E-11          |
| PCDHGC4     | -0,49801     | -10,4002    | 1,68E-14 | 1,52E-11         |
| ZIC4        | -0,57236     | -10,8343    | 3,09E-14 | 2,67E-11         |
| FTMT        | 0,286279     | 9,55958     | 4,46E-14 | 3,67E-11         |
| PLAC1L      | 0,270911     | 9,698521    | 5,68E-14 | 4,47E-11         |
| PRDM14      | -0,38673     | -11,3225    | 9,82E-14 | 7,41E-11         |
| PPBP        | 0,347585     | 9,511983    | 1,11E-13 | 8,08E-11         |
| CCDC81      | -0,28608     | -11,5474    | 1,78E-13 | 1,24E-10         |
| NAT10       | 0,147099     | 9,171194    | 2,61E-13 | 1,74E-10         |
| NPFF        | 0,315642     | 9,831009    | 2,69E-13 | 1,74E-10         |
| DARC        | 0,415528     | 9,094306    | 3,67E-13 | 2,22E-10         |
| PTGER2      | 0,27642      | 9,18517     | 3,74E-13 | 2,22E-10         |
| EOMES       | -0,17943     | -9,48899    | 3,81E-13 | 2,22E-10         |
| OR6C6       | 0,227617     | 9,036195    | 4,12E-13 | 2,3E-10          |
| PPEF2       | 0,334802     | 9,265531    | 4,26E-13 | 2,3E-10          |
| PALM2-AKAP2 | 0,338527     | 9,063493    | 4,45E-13 | 2,3E-10          |
| AKAP2       | 0,338527     | 9,063493    | 4,45E-13 | 2,3E-10          |

---

|              |          |          |          |          |
|--------------|----------|----------|----------|----------|
| ZAP70        | -0,34994 | -9,89104 | 4,75E-13 | 2,35E-10 |
| C9orf85      | 0,164249 | 8,976086 | 4,81E-13 | 2,35E-10 |
| MAMDC2       | -0,39826 | -10,7313 | 5,78E-13 | 2,75E-10 |
| OR10K2       | 0,287814 | 9,369155 | 6,07E-13 | 2,82E-10 |
| PIGR         | -0,39187 | -11,8492 | 8,2E-13  | 3,63E-10 |
| EBF1         | -0,52538 | -11,3989 | 8,22E-13 | 3,63E-10 |
| LAG3         | 0,343007 | 9,361982 | 9,89E-13 | 4,24E-10 |
| ARHGEF26     | -0,28899 | -8,96704 | 1,01E-12 | 4,24E-10 |
| C11orf54     | 0,191722 | 8,775572 | 1,14E-12 | 4,52E-10 |
| TAF1D        | 0,191722 | 8,775572 | 1,14E-12 | 4,52E-10 |
| TNIK         | -0,37155 | -10,8098 | 1,15E-12 | 4,52E-10 |
| BTN1A1       | -0,33531 | -8,76309 | 1,18E-12 | 4,56E-10 |
| CD53         | 0,320357 | 9,56731  | 1,21E-12 | 4,57E-10 |
| OR6N2        | 0,319501 | 8,949206 | 1,96E-12 | 7,23E-10 |
| FAM167B      | -0,44928 | -9,55185 | 2,06E-12 | 7,45E-10 |
| OR2T6        | 0,235445 | 8,598027 | 2,62E-12 | 9,32E-10 |
| RNF167       | 0,250724 | 8,578949 | 3,02E-12 | 1,01E-09 |
| SLC25A11     | 0,250724 | 8,578949 | 3,02E-12 | 1,01E-09 |
| AATF         | -0,25029 | -9,02346 | 3,04E-12 | 1,01E-09 |
| OR10J5       | 0,224953 | 8,540932 | 3,05E-12 | 1,01E-09 |
| MAPK10       | -0,31746 | -9,24485 | 3,26E-12 | 1,05E-09 |
| VSX2         | -0,25458 | -8,76791 | 4,15E-12 | 1,32E-09 |
| C3orf63      | 0,27007  | 8,434923 | 4,59E-12 | 1,43E-09 |
| TNNC2        | -0,32148 | -8,86615 | 5,79E-12 | 1,78E-09 |
| SNAPC5       | 0,207965 | 8,889018 | 5,96E-12 | 1,8E-09  |
| KCNK2        | 0,304723 | 8,423144 | 6,9E-12  | 2,05E-09 |
| SENP6        | 0,159338 | 8,503689 | 7,14E-12 | 2,09E-09 |
| RBM5         | 0,185756 | 8,421353 | 7,54E-12 | 2,17E-09 |
| ATP5B        | 0,195675 | 8,315281 | 7,75E-12 | 2,19E-09 |
| OR6C74       | 0,341786 | 8,829101 | 9,12E-12 | 2,54E-09 |
| GABRB2       | -0,12112 | -8,33341 | 9,27E-12 | 2,54E-09 |
| OR6C3        | 0,242178 | 8,300873 | 9,62E-12 | 2,6E-09  |
| OR10T2       | 0,324871 | 8,260927 | 1,04E-11 | 2,77E-09 |
| SST          | 0,258881 | 8,803299 | 1,06E-11 | 2,77E-09 |
| TMPRSS11F    | 0,247861 | 8,199343 | 1,17E-11 | 3,02E-09 |
| OR4D6        | 0,264712 | 8,366908 | 1,23E-11 | 3,14E-09 |
| RNF111       | 0,151005 | 8,189983 | 1,31E-11 | 3,26E-09 |
| SLCO1C1      | 0,383073 | 8,301737 | 1,35E-11 | 3,26E-09 |
| UBB          | 0,196593 | 8,434834 | 1,36E-11 | 3,26E-09 |
| ADAM12       | -0,46693 | -8,86772 | 1,37E-11 | 3,26E-09 |
| IDI2         | 0,405176 | 8,558495 | 1,38E-11 | 3,26E-09 |
| EVX2         | -0,29003 | -9,28364 | 1,38E-11 | 3,26E-09 |
| NUDT9        | 0,238172 | 8,208318 | 1,45E-11 | 3,37E-09 |
| TIMP3        | 0,295791 | 8,52929  | 1,57E-11 | 3,57E-09 |
| RRH          | 0,335432 | 8,524068 | 1,58E-11 | 3,57E-09 |
| GNAQ         | -0,11932 | -8,11363 | 1,67E-11 | 3,73E-09 |
| TELO2        | 0,265363 | 8,324775 | 1,7E-11  | 3,75E-09 |
| HLX          | -0,3889  | -9,70416 | 1,75E-11 | 3,8E-09  |
| RP11-542P2.1 | -0,30696 | -8,15172 | 1,76E-11 | 3,8E-09  |
| CCT4         | 0,327336 | 8,078014 | 1,98E-11 | 4,21E-09 |
| OSR2         | -0,41564 | -10,3744 | 2,48E-11 | 5,17E-09 |

---

|                |          |          |          |          |
|----------------|----------|----------|----------|----------|
| <b>ADAMTS1</b> | -0,24492 | -8,52989 | 2,48E-11 | 5,17E-09 |
| <b>NR3C2</b>   | -0,1291  | -8,13207 | 2,71E-11 | 5,57E-09 |
| <b>SYT4</b>    | 0,378887 | 8,572356 | 2,79E-11 | 5,59E-09 |
| <b>GTF2I</b>   | 0,264282 | 7,988684 | 2,8E-11  | 5,59E-09 |
| <b>GNG8</b>    | -0,24911 | -8,53169 | 2,81E-11 | 5,59E-09 |
| <b>ADPRHL1</b> | 0,279854 | 8,122394 | 2,84E-11 | 5,6E-09  |
| <b>LYPD2</b>   | 0,260601 | 8,398465 | 3,02E-11 | 5,88E-09 |
| <b>TXNRD1</b>  | -0,58021 | -10,4661 | 3,12E-11 | 5,98E-09 |
| <b>KLRC4</b>   | 0,284207 | 8,211138 | 3,14E-11 | 5,98E-09 |
| <b>KLLN</b>    | -0,19878 | -7,94059 | 3,38E-11 | 6,35E-09 |
| <b>PYHIN1</b>  | 0,326126 | 8,145323 | 3,4E-11  | 6,35E-09 |
| <b>CD5L</b>    | 0,323332 | 7,975074 | 3,88E-11 | 7,16E-09 |
| <b>TAL1</b>    | -0,36442 | -9,70997 | 3,93E-11 | 7,2E-09  |
| <b>PTEN</b>    | -0,19595 | -7,89587 | 4,1E-11  | 7,42E-09 |

### Methylation cluster 2 versus methylation cluster 3.

| <b>SYMBOL</b>     | <b>median diff.</b> | <b>T-statistic</b> | <b>p-value</b> | <b>adjusted p-value</b> |
|-------------------|---------------------|--------------------|----------------|-------------------------|
| <b>HLF</b>        | -0,61625            | -26,3177           | 1,39E-38       | 2,52E-34                |
| <b>SOX2</b>       | -0,62376            | -24,4961           | 1,18E-36       | 1,07E-32                |
| <b>SIX6</b>       | -0,52924            | -24,5201           | 4,82E-36       | 2,91E-32                |
| <b>DLX4</b>       | -0,63074            | -23,7154           | 1,17E-35       | 5,29E-32                |
| <b>ARL5C</b>      | -0,6343             | -23,4401           | 4,62E-35       | 1,67E-31                |
| <b>MEIS1</b>      | -0,55921            | -22,7248           | 1,43E-34       | 4,31E-31                |
| <b>ZIC1</b>       | -0,58565            | -22,8476           | 3,8E-34        | 9,83E-31                |
| <b>TAL1</b>       | -0,47138            | -22,0229           | 1,29E-33       | 2,93E-30                |
| <b>TLX1</b>       | -0,41685            | -21,3368           | 1,17E-32       | 2,35E-29                |
| <b>SIX2</b>       | -0,52226            | -26,4203           | 2,13E-32       | 3,85E-29                |
| <b>SOX9</b>       | -0,49605            | -21,0608           | 3,51E-32       | 5,79E-29                |
| <b>VAX1</b>       | -0,55105            | -20,6497           | 1,04E-31       | 1,56E-28                |
| <b>CALCB</b>      | -0,61952            | -20,6122           | 1,12E-31       | 1,56E-28                |
| <b>NKX3-2</b>     | -0,54025            | -20,8104           | 2,14E-31       | 2,77E-28                |
| <b>PDGFRA</b>     | -0,61578            | -21,2699           | 2,74E-31       | 3,31E-28                |
| <b>TMEM171</b>    | -0,41869            | -21,2482           | 1,39E-30       | 1,57E-27                |
| <b>TBX4</b>       | -0,61565            | -23,6703           | 3,27E-30       | 3,48E-27                |
| <b>VAX2</b>       | -0,50646            | -20,3375           | 1,39E-29       | 1,4E-26                 |
| <b>PRDM14</b>     | -0,48913            | -19,4726           | 1,99E-29       | 1,9E-26                 |
| <b>HOXD13</b>     | -0,45444            | -18,8809           | 2,24E-29       | 1,98E-26                |
| <b>OSR2</b>       | -0,48975            | -19,7575           | 2,3E-29        | 1,98E-26                |
| <b>PRAC</b>       | -0,4578             | -18,7522           | 3,23E-29       | 2,66E-26                |
| <b>FEZF1</b>      | -0,4667             | -18,3678           | 7,15E-29       | 5,52E-26                |
| <b>C11orf20</b>   | -0,41413            | -20,2851           | 7,31E-29       | 5,52E-26                |
| <b>LY75</b>       | -0,64746            | -18,1877           | 1,31E-28       | 9,15E-26                |
| <b>LY75-CD302</b> | -0,64746            | -18,1877           | 1,31E-28       | 9,15E-26                |
| <b>ACTC1</b>      | -0,47519            | -18,0529           | 1,93E-28       | 1,3E-25                 |
| <b>GYPC</b>       | -0,3913             | -18,5292           | 2,05E-28       | 1,33E-25                |
| <b>TCF21</b>      | -0,47818            | -18,4745           | 2,61E-28       | 1,63E-25                |
| <b>SHISA3</b>     | -0,44915            | -20,3567           | 3,15E-28       | 1,9E-25                 |
| <b>TBX15</b>      | -0,49679            | -18,0653           | 3,79E-28       | 2,21E-25                |

---

|                    |          |          |          |          |
|--------------------|----------|----------|----------|----------|
| <b>ADCYAP1R1</b>   | -0,3732  | -18,6464 | 5,69E-28 | 3,16E-25 |
| <b>C2CD4B</b>      | -0,53864 | -17,7535 | 5,77E-28 | 3,16E-25 |
| <b>TNIK</b>        | -0,40409 | -17,497  | 1,29E-27 | 6,87E-25 |
| <b>CYP11A1</b>     | -0,56655 | -18,1166 | 1,54E-27 | 7,97E-25 |
| <b>CACNA2D3</b>    | -0,42306 | -17,5216 | 2,24E-27 | 1,13E-24 |
| <b>DMRT2</b>       | -0,45865 | -17,3183 | 2,6E-27  | 1,27E-24 |
| <b>STRA6</b>       | 0,414053 | 17,43725 | 2,9E-27  | 1,38E-24 |
| <b>ESRP2</b>       | -0,54298 | -17,5109 | 3,45E-27 | 1,6E-24  |
| <b>CALCA</b>       | -0,55738 | -17,6862 | 1E-26    | 4,55E-24 |
| <b>C9orf47</b>     | -0,26215 | -16,8668 | 1,6E-26  | 6,91E-24 |
| <b>S1PR3</b>       | -0,26215 | -16,8668 | 1,6E-26  | 6,91E-24 |
| <b>CCNA1</b>       | -0,53167 | -18,1718 | 1,86E-26 | 7,83E-24 |
| <b>C2orf40</b>     | -0,59829 | -16,7464 | 2,72E-26 | 1,12E-23 |
| <b>LHX2</b>        | -0,40989 | -18,3722 | 2,9E-26  | 1,17E-23 |
| <b>LMO3</b>        | -0,51051 | -22,6844 | 5,49E-26 | 2,16E-23 |
| <b>GABRG2</b>      | -0,40566 | -16,2759 | 9,34E-26 | 3,6E-23  |
| <b>RTP4</b>        | -0,29583 | -16,1936 | 1,16E-25 | 4,39E-23 |
| <b>FXR1</b>        | -0,43666 | -16,5867 | 1,66E-25 | 6,15E-23 |
| <b>FHL3</b>        | -0,37875 | -16,0516 | 2,45E-25 | 8,89E-23 |
| <b>ZNF750</b>      | 0,346853 | 16,84456 | 2,88E-25 | 1,02E-22 |
| <b>CFTR</b>        | -0,62019 | -16,4117 | 3,45E-25 | 1,2E-22  |
| <b>TLX2</b>        | -0,55852 | -15,828  | 3,81E-25 | 1,3E-22  |
| <b>CTC-203F4.1</b> | -0,50742 | -15,8341 | 4,7E-25  | 1,58E-22 |
| <b>NCK2</b>        | -0,33204 | -15,8191 | 5,22E-25 | 1,72E-22 |
| <b>B4GALT6</b>     | -0,36924 | -17,9756 | 5,76E-25 | 1,86E-22 |
| <b>LEF1</b>        | -0,36351 | -15,9876 | 6,15E-25 | 1,95E-22 |
| <b>ENPP2</b>       | -0,3312  | -16,0856 | 1,51E-24 | 4,72E-22 |
| <b>ANK1</b>        | -0,5809  | -15,415  | 1,79E-24 | 5,5E-22  |
| <b>SSPN</b>        | -0,36409 | -15,3848 | 1,86E-24 | 5,6E-22  |
| <b>P2RX7</b>       | -0,43085 | -16,2124 | 1,92E-24 | 5,71E-22 |
| <b>HIST1H4A</b>    | -0,52018 | -15,3812 | 2,05E-24 | 6E-22    |
| <b>SULF2</b>       | -0,31839 | -18,8338 | 2,1E-24  | 6,02E-22 |
| <b>LECT1</b>       | -0,6554  | -15,9546 | 2,13E-24 | 6,02E-22 |
| <b>IZUMO4</b>      | 0,470086 | 15,38767 | 2,26E-24 | 6,31E-22 |
| <b>STON2</b>       | -0,58836 | -15,7739 | 2,46E-24 | 6,74E-22 |
| <b>GALNT3</b>      | -0,49832 | -15,2702 | 2,92E-24 | 7,89E-22 |
| <b>OTX1</b>        | -0,49424 | -18,6604 | 3,04E-24 | 8,1E-22  |
| <b>SLC2A5</b>      | -0,30765 | -15,2269 | 3,37E-24 | 8,85E-22 |
| <b>CLIC5</b>       | -0,41322 | -15,2724 | 4,23E-24 | 1,09E-21 |
| <b>LHX9</b>        | -0,54166 | -15,1909 | 4,43E-24 | 1,13E-21 |
| <b>HIST1H3A</b>    | -0,55768 | -15,1765 | 4,83E-24 | 1,2E-21  |
| <b>HIST1H1A</b>    | -0,55768 | -15,1765 | 4,83E-24 | 1,2E-21  |
| <b>LAMC2</b>       | -0,62221 | -15,4263 | 5,12E-24 | 1,25E-21 |
| <b>WWP2</b>        | 0,326621 | 15,11809 | 6,38E-24 | 1,49E-21 |
| <b>RSRC1</b>       | -0,42317 | -15,4249 | 6,43E-24 | 1,49E-21 |
| <b>SHOX2</b>       | -0,42317 | -15,4249 | 6,43E-24 | 1,49E-21 |
| <b>AC112502.1</b>  | -0,42317 | -15,4249 | 6,43E-24 | 1,49E-21 |
| <b>NTRK2</b>       | -0,39522 | -15,2082 | 6,69E-24 | 1,53E-21 |
| <b>DOK6</b>        | -0,51572 | -15,3084 | 7,76E-24 | 1,76E-21 |
| <b>HOXB13</b>      | -0,38912 | -14,9633 | 8,64E-24 | 1,93E-21 |
| <b>CCDC81</b>      | -0,29283 | -15,5301 | 9E-24    | 1,99E-21 |

---

---

|                  |          |          |          |          |
|------------------|----------|----------|----------|----------|
| <b>BHLHE41</b>   | -0,29277 | -15,2371 | 1,11E-23 | 2,41E-21 |
| <b>MEGF10</b>    | -0,4801  | -15,0624 | 1,12E-23 | 2,41E-21 |
| <b>MAMDC2</b>    | -0,39043 | -14,9725 | 1,19E-23 | 2,54E-21 |
| <b>EREG</b>      | -0,43461 | -16,1623 | 1,21E-23 | 2,55E-21 |
| <b>TM2D3</b>     | 0,405798 | 14,87456 | 1,23E-23 | 2,56E-21 |
| <b>ELN</b>       | -0,27345 | -16,5453 | 1,25E-23 | 2,57E-21 |
| <b>ALX1</b>      | -0,55848 | -15,1255 | 1,44E-23 | 2,94E-21 |
| <b>ALPL</b>      | -0,26052 | -16,4576 | 1,48E-23 | 2,98E-21 |
| <b>GATA4</b>     | -0,45554 | -17,1492 | 1,59E-23 | 3,16E-21 |
| <b>MOBKL2A</b>   | 0,454906 | 14,80364 | 1,6E-23  | 3,16E-21 |
| <b>LASP1</b>     | -0,4061  | -16,2578 | 1,74E-23 | 3,39E-21 |
| <b>PITX1</b>     | -0,48475 | -14,9196 | 2,55E-23 | 4,91E-21 |
| <b>PAX5</b>      | -0,33027 | -14,7058 | 2,7E-23  | 5,15E-21 |
| <b>BARHL2</b>    | -0,51413 | -14,4991 | 4,75E-23 | 8,95E-21 |
| <b>PIP5K1B</b>   | -0,20056 | -14,5065 | 4,91E-23 | 9,16E-21 |
| <b>C10orf116</b> | -0,57078 | -17,2996 | 6,19E-23 | 1,14E-20 |
| <b>LRRIQ4</b>    | 0,329337 | 14,43123 | 6,6E-23  | 1,21E-20 |
| <b>CNTN2</b>     | -0,41901 | -15,0834 | 6,73E-23 | 1,22E-20 |

---
